# Supplementary material for: Simultaneously photodeposited rhodium metal and oxide nanoparticles promoting photocatalytic hydrogen production
Source: Royal Society of Chemistry journal article supplement (doi:10.1039/c1cc12287h), 2011-01-01
Supplement: c1cc12287h.pdf [file c1cc12287h.pdf]

## **Supporting information**

### **Simultaneously photodeposited rhodium metal and oxide nanoparticles promoting photocatalytic hydrogen production**

*Katsuya Shimura,<sup>a</sup> Hiromasa Kawai,<sup>a</sup> Tomoko Yoshida<sup>b</sup> and Hisao Yoshida<sup>\*a</sup>*

<sup>a</sup> *Department of Applied Chemistry, Graduate School of Engineering, Nagoya University, Furo-cho, Chikusa-ku, Nagoya, 464-8603, Japan.*

<sup>b</sup> *Division of Environmental Research, EcoTopia Science Institute, Nagoya University, Nagoya, 464-8603, Japan.*

\* Corresponding author. E-mail: [yoshidah@apchem.nagoya-u.ac.jp](mailto:yoshidah@apchem.nagoya-u.ac.jp)

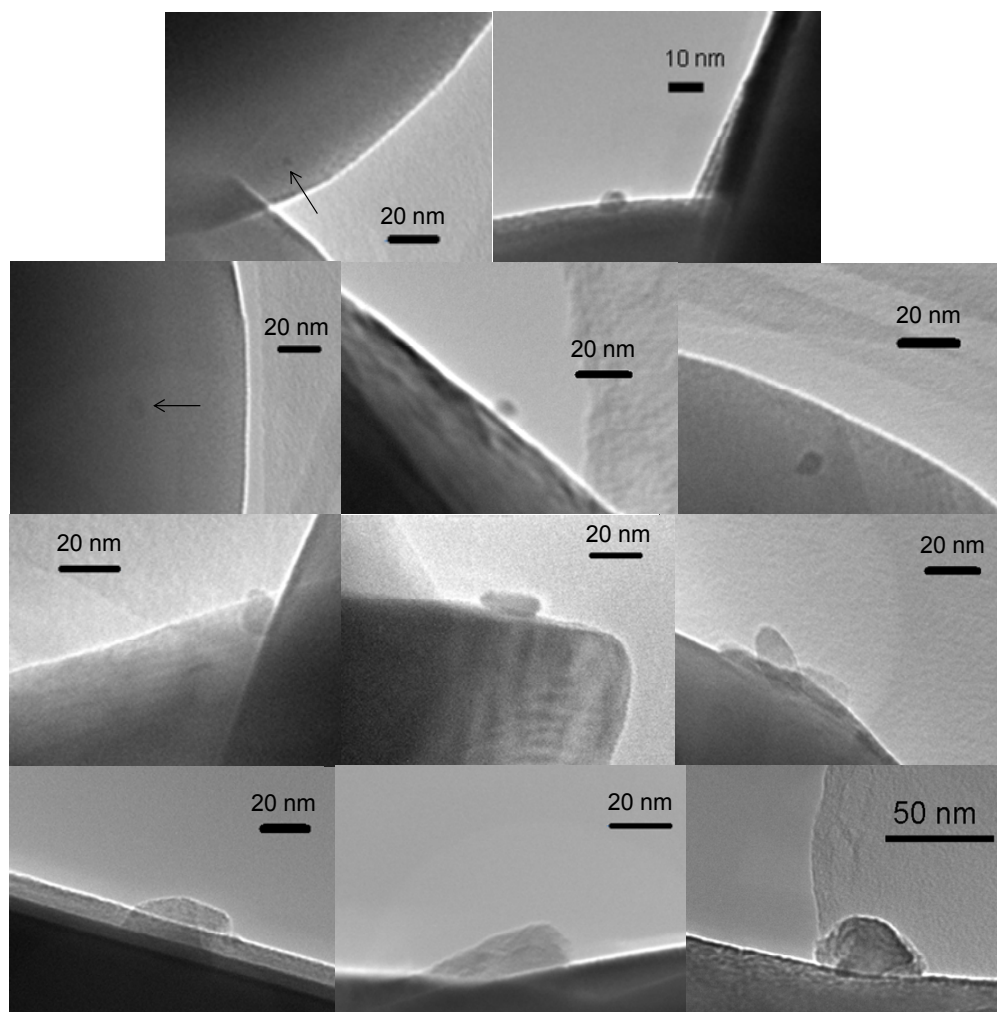

**Figure S1** TEM images of the Rh cocatalyst on the Rh(0.1 wt%)/K<sub>2</sub>Ti<sub>6</sub>O<sub>13</sub> sample prepared by the photodeposition (P) method.

The Rh cocatalyst nanoparticles were highly dispersed on the surface of K<sub>2</sub>Ti<sub>6</sub>O<sub>13</sub>. Not only the small hemispherical nanoparticles (2.5-12 nm, typically 9 nm) but also the obviously large nanoparticles (25-50 nm, typically 40 nm) were observed.
